# Supplementary material
Source: PubMed Central journal article supplement (PMC4691850)

short pAgO

short pAgO

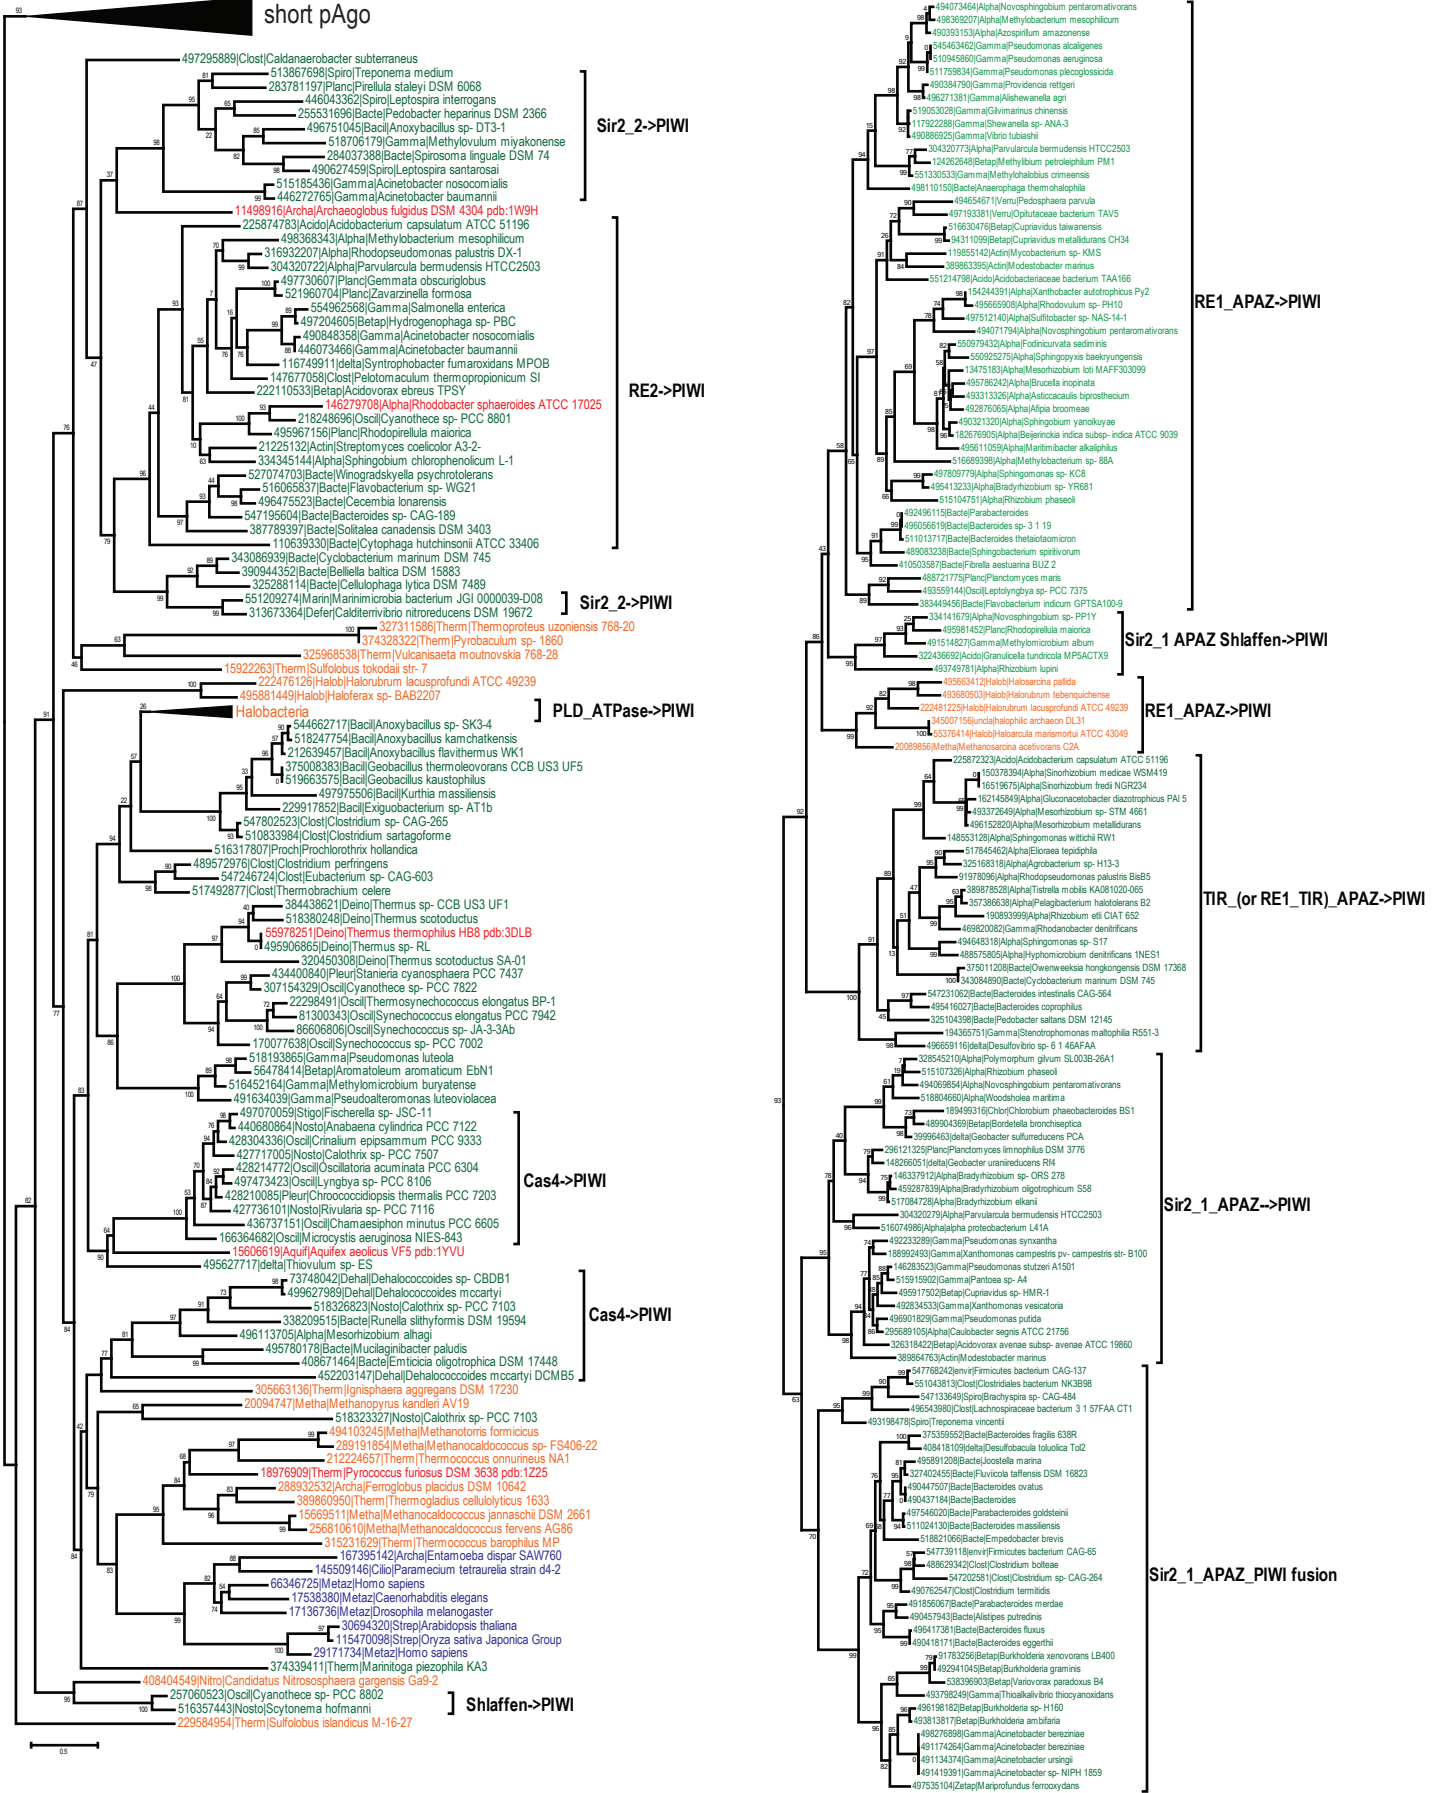

Supplement: NIHMS743905-supplement-Supplementary_Data_3.pdf [file NIHMS743905-supplement-Supplementary_Data_3.pdf]

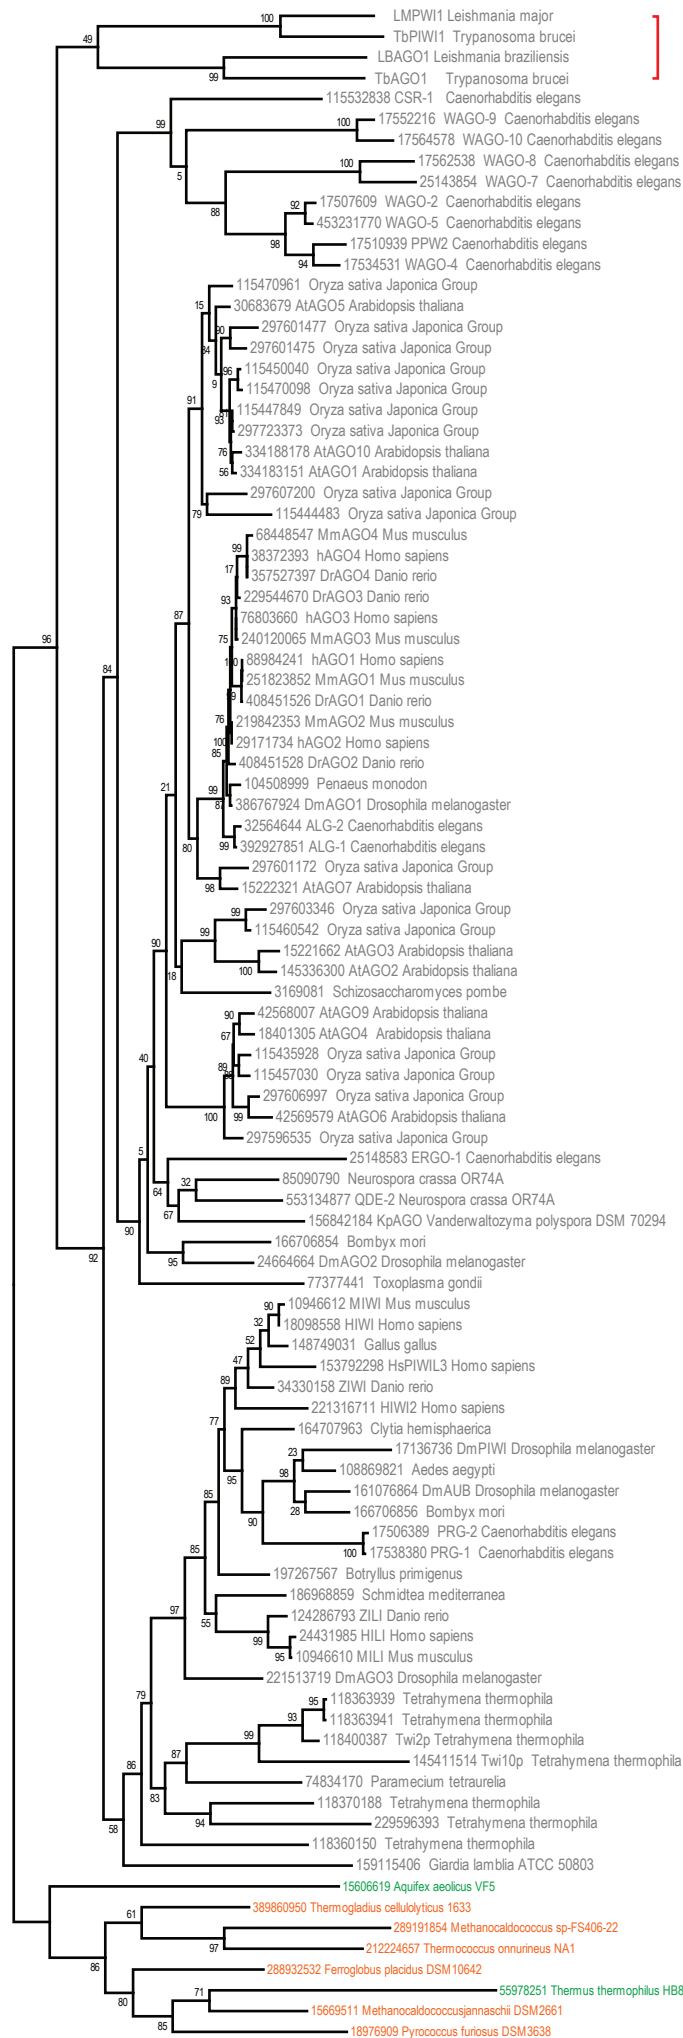

## Trypanosoma Ago family

## WAGO family

## Ago-like family

## PIWI-like family

0.1

Supplement: NIHMS743905-supplement-Supplementary_Data_5.pdf [file NIHMS743905-supplement-Supplementary_Data_5.pdf]
